# Supplementary material for: Power Prediction of a 15,000 TEU Containership: Deep-Learning Algorithm Compared to a Physical Model
Source: MDPI journal article supplement (doi:10.3390/jmse11101854), 2023-09-23
Supplement: s1 [file jmse-2594403-supplementary.xlsx]

## Sheet: jmse-2594403-supplementary
July					September
Sample	Reported	DNN	SNAM		Sample	Reported	DNN	SNAM
0	30749.8	30325.1	30278		0	34035.5	34452.4	33168.1
1	30730.2	30681	30037.8		1	33586.4	33869.3	32977.5
2	30706.4	30578.2	29924.8		2	33298.3	33783.4	33486.4
3	30732.4	30598.8	29951		3	33354.2	33722.1	33756.7
4	31046.1	30918.9	29746.8		4	33332.4	33695.6	33406.8
5	31341.3	31138.4	29632.6		5	33318.6	33649.1	33535.9
6	31411.1	31202.1	29598.1		6	33324.9	33693	33303.1
7	31482.9	31218.4	29638.2		7	33261.7	33548	32975
8	31542.2	31274.4	29699.8		8	33185.6	33471.3	33006.8
9	31689.7	31383.5	29895.7		9	33238.9	33382.7	32985.1
10	31788.2	31471.4	30169.5		10	33168.7	33391.4	33226.7
11	31738.3	31442.3	30260.4		11	33274	33357.2	32895.7
12	31841.8	31531.2	30021.8		12	33297.8	33322.4	33007.5
13	32040.7	31715.1	29678.3		13	33275.3	33339.5	32901.7
14	32101	31885.7	29631		14	33117.9	33018.4	33098.7
15	32052	31934.8	29498.1		15	33098.3	32983.1	33151.2
16	32032.3	31899.1	29163.8		16	33220.8	33067	32859.9
17	31841.8	31737	29224.6		17	33221.7	33102.7	32976
18	31618.6	31529.9	29098.9		18	33289.9	33124.2	32696.4
19	31439.2	31355.5	29060.6		19	33412.6	33010.3	32411.9
20	31460.9	31319.8	29343.3		20	33375.4	33049.9	32437
21	31644.2	31466.7	29521.8		21	33292.3	32853.4	32698.6
22	31696.2	31674.2	29594		22	34009.6	33500.8	31986.1
23	31643.2	31649.9	29521.3		23	34658.4	34003.7	31309.4
24	31518.3	31443	29499.8		24	34488.1	33913.2	31783.3
25	31335.1	31292.6	29600.4		25	34220.5	33712.1	31945.5
26	31101.5	31077.6	29656.8		26	34056.8	33509.4	31899
27	31044.9	30950.7	29670.4		27	33723.6	33373	32222.4
28	31224.3	30990.1	29636		28	33543.9	33136.6	32140.5
29	31452.2	31096.7	29643		29	32863.5	32524.2	32492.1
30	31720.3	31336.6	29535.2		30	32504.9	32179.1	32727.7
31	31949.7	31517.9	29577.1		31	32734	32328	32427.5
32	31800	31407.1	29652.9		32	32877.3	32528.4	31870.7
33	31647.5	31287.5	29648.1		33	33082.9	32809.1	32001.1
34	31561.4	31188.6	29684		34	32333.6	32177.6	32787.3
35	31500.3	31193.2	29686.7		35	32222.7	32073.5	32754.2
36	31464.9	31158.6	29551.1		36	32487.1	32711.5	33604
37	31409.4	31123.9	29375.6		37	32497.4	32897.8	32463
38	31285.3	31056.3	29653.4		38	32683.4	33028.4	32008.7
39	31241.6	30973	30263.4		39	32329.6	31972.8	32101.5
40	31369.6	31054	30236.7		40	32271	31974.9	32339.2
41	31282.6	31032	30160.9		41	32254.4	31999.1	32688.8
42	31247.7	31035.5	30304.7		42	32254.1	32030.3	33044.2
43	31352.9	31110.3	30302.9		43	32255.5	31968.3	33056.4
44	31449.6	31168.1	30089.7		44	32205.3	31961.9	32998.9
45	31363.9	31119.4	30028.2		45	32191.7	31917.5	33085.6
46	31306.6	31074.8	30130		46	32517.1	32383.8	32592
47	31339.9	31059.5	30411.9		47	32532.2	32423	32740.5
48	31457.3	31055.9	30727.8		48	32203.2	32179.8	32834.9
49	31771.6	31214.9	30816.9		49	32040.9	32007.3	33242.7
50	31983.1	31390.2	30624.9		50	31814.3	31909.4	33668.9
51	31963.3	31430.3	30436.3		51	31809.5	31891.4	33460.9
52	32014.4	31450.5	30204.1		52	32005.7	31888.6	33243.9
53	32122	31527.5	30390.8		53	32014.3	31917.7	32914.9
54	31981.9	31389.7	30671.9		54	31940.4	31932.2	33102.9
55	32047.8	31450.8	30503.3		55	32009.2	32012.2	33220
56	32095.8	31527	30271.7		56	32045	32084.4	33134.6
57	32142.5	31643.1	29923.7		57	32083.9	32084	32830.9
58	32270.8	31847.3	29714.5		58	31861.1	31886	33156.1
59	32309.7	31917.3	29708.8		59	31900.8	31886.9	33150
60	32321.7	31932.3	29917.5		60	32092.1	31762.4	32892.8
61	32362.3	31980.2	29998.6		61	32227.6	31799.1	32696.7
62	32337.6	31927.7	29941.7		62	32445.3	32214	32275.3
63	32114.3	31736.8	30258.3		63	32364.9	32205	32459.8
64	32153.5	31756.3	30860.6		64	31983.9	31924.3	33015.7
65	32266.8	31809.3	30844.1		65	31749	31755.1	33428.8
66	32210.9	31711.3	30486.9		66	31868.5	31835.8	33004.2
67	32209.6	31657.5	30299.8		67	32058.8	31915	32635.3
68	32248.4	31750.6	30763.7		68	31744.5	31347.7	33370.6
69	32273.6	31818.2	30247.7		69	31566.6	31195.2	33607.6
70	32541.7	32022.5	29728.5		70	31722.7	31289.5	33163.8
71	32416.9	31988.8	29734.8		71	31859.6	31429.6	32815.7
72	31759.5	31555.3	29960.2		72	31966.1	31508.5	32606.4
73	31663.1	31386.9	29790.6		73	31925.9	31529.5	32719.2
74	31840.4	31402.4	30547.5		74	31999.3	31752.8	32600
75	31403.1	30999.4	29314.2		75	32003.7	31792.3	32834
76	31492.7	30981.9	27789.5		76	31904.5	31685.1	32962.7
77	31536.6	31239.4	29437.2		77	31691.1	31588.4	33117.5
78	31231.4	31003.9	29418		78	31490	31449.8	33670.1
79	31104.3	30891.8	29492.6		79	31738	31890.7	33111.8
80	31018.6	30809.7	29835.3		80	31783.9	31713.9	32850.4
81	30996.8	30741.9	29929.6		81	31876.1	31852.8	32656
82	31179.6	30843.3	29647.8		82	32034.4	32240.9	32435.7
83	31537.2	31072.1	29296.3		83	31784.1	32057.7	32886.5
84	31595.5	31150	29143.2		84	30669.5	30932.5	32335.4
85	31582.7	31199.2	29239.2		85	29589.5	29821.7	30965.7
86	31732	31155.1	30020.2		86	30365.4	30625.8	30158.6
87	31714.6	31041.4	30223.3		87	30627.7	30833.7	29002
88	31535.8	30844.8	30386.9		88	30145.5	30468	28486.3
89	31463.5	30761.1	30369.6		89	29507.7	28833.8	28415.3
90	31548.3	30908.4	30380.4		90	28976.6	28850.4	28646.8
91	31534.8	30917.2	29721.5		91	29072	28820.7	28923
92	31395.5	30863.4	28766.2		92	29356.5	28971	28539.4
93	31387.2	30963.9	28831.6		93	29518.5	28965.1	28441.9
94	31667.4	30989.6	28789.4		94	29420.9	28793.9	28768.9
95	31981.2	31105.5	28719.3		95	29384.4	28740.6	28779.1
96	31861.5	30849.5	29206		96	29425.3	28760.6	28652.7
97	31942.5	30840.4	29219.8		97	29455.8	28762.3	28641.3
98	31978.8	30768.7	29109		98	29421	28709.7	28764.7
99	31813.5	30598.6	29413.4		99	29437.1	28706.7	28682.6
100	31580.5	30468.3	29881.6		100	29622.1	28837.8	28442.3
101	31423	30395.2	30309		101	29624.6	28796	28320.7
102	31479.4	30473.7	30493.5		102	29454.7	28629.5	28447.4
103	31523.7	30533.6	30587.4		103	29389.6	28561.9	28529.1
104	31214.9	30251.2	30264.1		104	29391.6	28548.2	28560.6
105	30812	29846.6	29624.6		105	29385.5	28557.8	28517.5
106	30760.9	29755.1	29338.1		106	29590.1	28710.4	27971.6
107	30737.1	29758	29277.8		107	29691.8	28731.5	27900.8
108	30787.6	29793.6	29242.8		108	29529.4	28567	28345.7
109	30770.3	29804.3	29280.7		109	29272.2	28405.9	28648.5
110	30838.3	29866.1	29174.2		110	29382.1	28477.5	28413.4
111	30985.2	30027.2	29145.7		111	29438.8	28497.3	28131.9
112	31126.8	30164.2	29037.5		112	29426.3	28480	28379.5
113	31132.8	30181.3	29038.9		113	29606.7	28596	28265
114	31172.2	30239.3	29044.1		114	29600.1	28606.8	28258.7
115	31151.2	30255.6	29030.1		115	29668.9	28634.3	27999.6
116	31135.6	30245.5	29088.9		116	29766.6	28678.8	27825
117	31289.1	30362.6	29007.5		117	29620.1	28572.4	28157.3
118	31402.2	30466	28982.3		118	29545.5	28517.8	28057.6
119	31376.9	30459.5	29125.7		119	29567.5	28501.4	27946.3
120	31394.9	30482.6	29189.4		120	29462	28451.2	28369
121	31371.2	30491.7	29249.3		121	29506.3	28488.7	28477.4
122	31374.6	30484.6	29209.6		122	29609.1	28575.3	28283.4
123	31393.4	30458.4	29185.3		123	29567.1	28553.2	28236.2
124	31463.4	30506.4	29157.4		124	29579.6	28536.7	28256.2
125	31403.5	30494.2	29181.7		125	29511	28493.3	28605
126	31307.4	30433.3	29058		126	29493.1	28478.9	28498
127	31505.7	30532.6	28967.1		127	29666.8	28600.7	28084.2
128	31723.7	30698	29398.5		128	29724.3	28643	28185.7
129	31500.8	30466.1	30046.4		129	29678.2	28601.6	28143.8
130	31434.1	30475.9	30278.4		130	29666.4	28582.3	28179.4
131	31442	30539.2	29875.9		131	29681.1	28571.8	28375.9
132	31463.9	30665.1	29758		132	29684.5	28602.1	28369.9
133	31696.1	30838.3	29827.7		133	29777.6	28684.5	27946.8
134	31689.2	30835.1	29833.8		134	29794.3	28692.2	27902.6
135	31565.8	30779.9	29761		135	29860.6	28732.9	28103.9
136	31548.2	30773.6	29865.4		136	29947.4	28762	27971.1
137	30863	30166.6	29800.5		137	29888.5	28689.3	28017.7
138	29890.4	29266.2	28883.7		138	29864.9	28670.5	28193.2
139	29671.9	29026.4	28421.9		139	29930.6	28730.1	28004.7
140	29586.5	28973.1	28206.9		140	29905.6	28692.4	28145.9
141	29557.2	28925.8	28227.1		141	29906.7	28692.7	28125.1
142	29377.7	28816.9	28342.5		142	30014.1	28779.7	28077.4
143	29198.9	28723	28419.6		143	29899	28684.7	28168.2
144	29180.2	28698.5	28275.4		144	29943.7	28734.6	28078.6
145	29265.1	28709.2	28198.4		145	30063.2	28827.4	28407.2
146	29254.8	28683.5	28302.8		146	30005.9	28778.1	28226.5
147	29237.4	28694.1	28254.8		147	30149.4	28879.7	28027.4
148	29217.6	28654.6	28079.4		148	30073.3	28811.6	28236.8
149	29219.7	28618.9	27987.4		149	30113.6	28861.7	28137.8
150	29206.5	28603.4	28003		150	30081.8	28840.5	28298.2
